# Supplementary material
Source: publisher site journal article supplement (https://www.dovepress.com/article/303151)
Supplement: Supplementary file 1 [file get_supplementary_file.php]

**
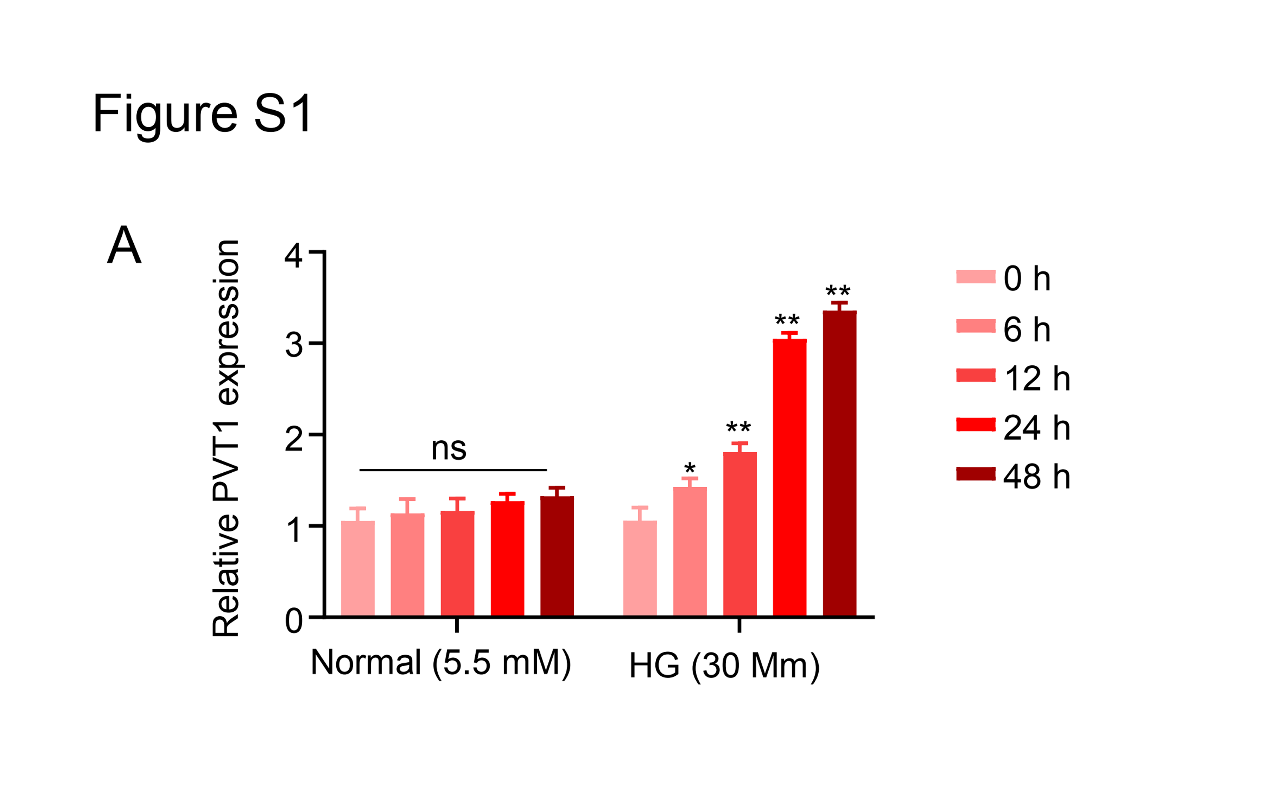
**

**Fig S1. The relative expression of PVT1 in MCs with change over time was detected by qRT-PCR.** ***P< 0.05, **P< 0.01.**


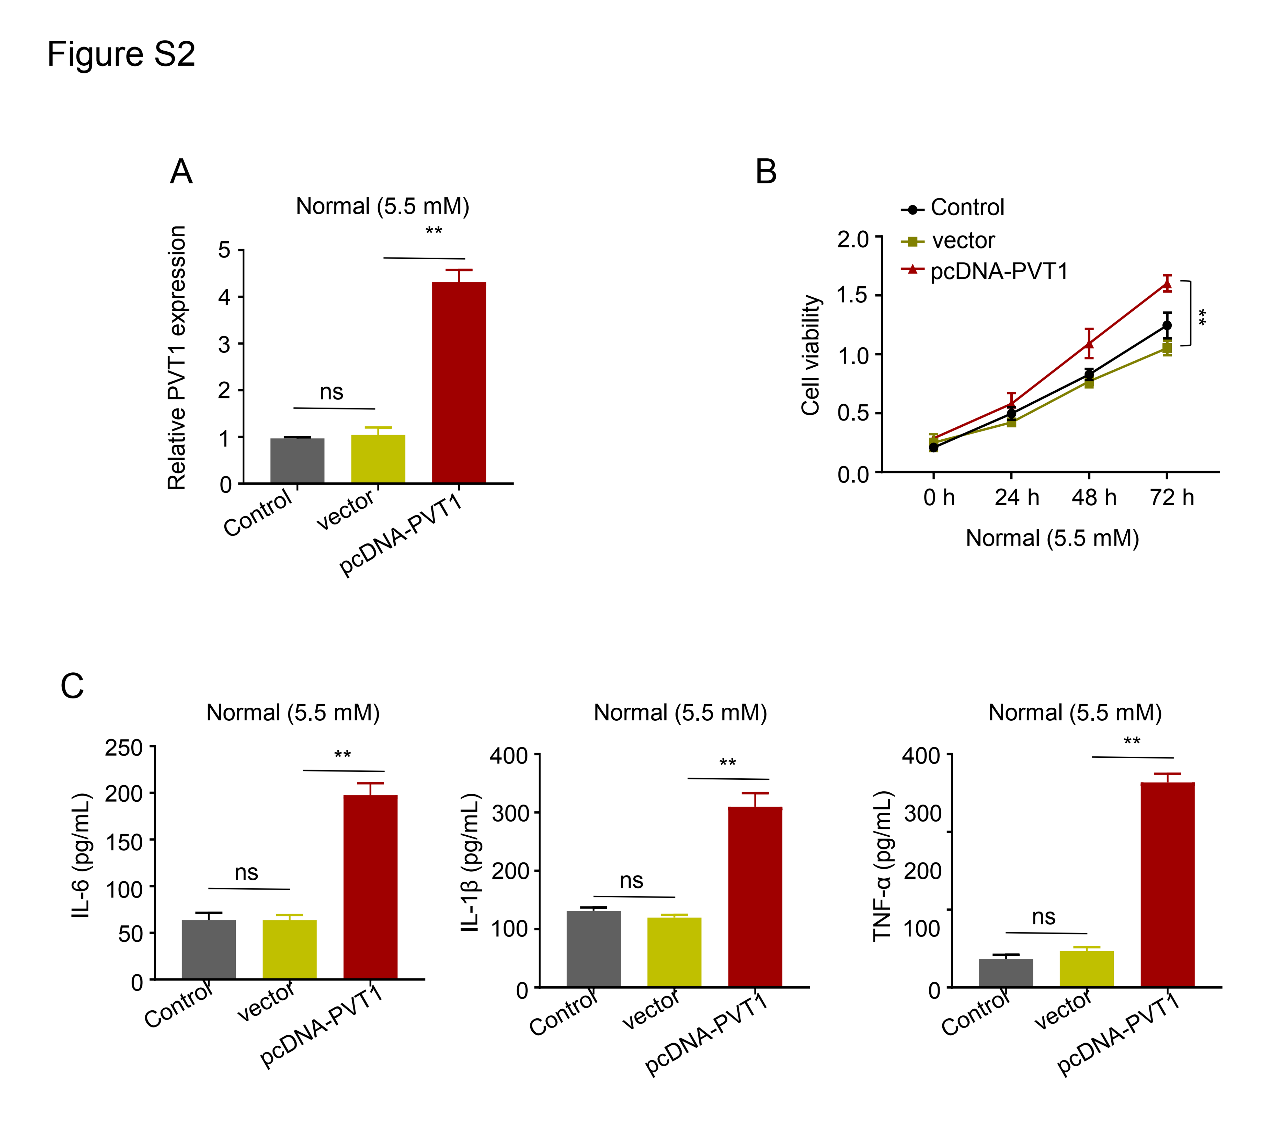


**Fig S2. Overexpression of PVT1 on normal treated MCs activity and inflammation response.**

(A) The relative expression of PVT1 in normal MCs transfected with pcDNA-PVT1 was detected by qRT-PCR. (B) The cell viability of normal MCs transfected with pcDNA-PVT1 was assessed through CCK8 assay. (C) The level of inflammatory cytokines IL-6, IL-1β, and TNF-α, produced by normal MCs after PVT1 overexpression. **P< 0.01.


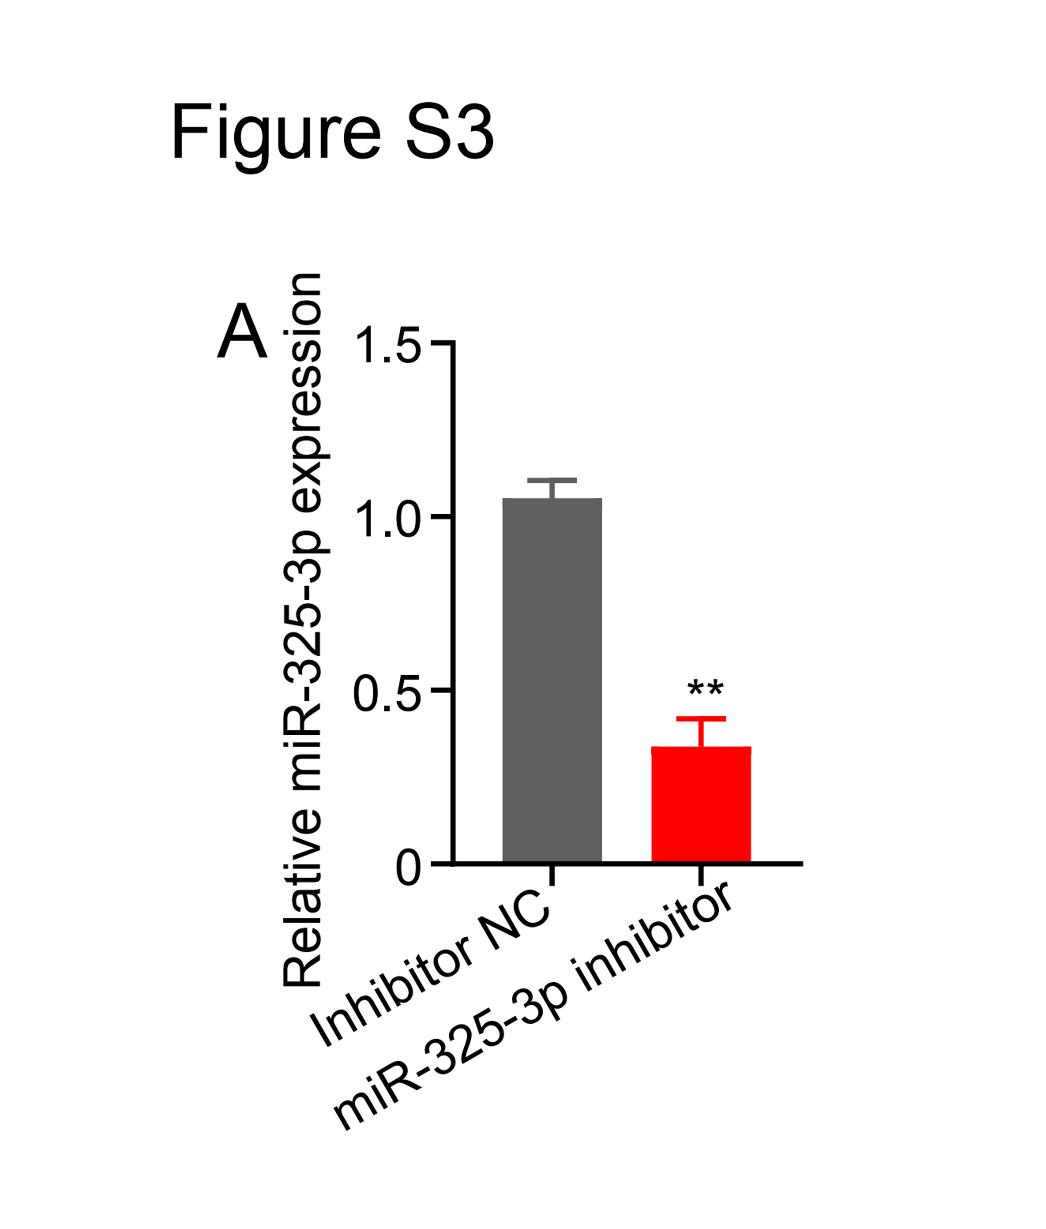


**Fig S3. The relative expression of miR-325-3p in normal HG-induced MCs transfected with miR-325-3p inhibitor was detected by qRT-PCR. **P< 0.01.**
